# Supplementary material
Source: Springer Nature journal article supplement (https://www.springermedizin.de/resource/supplementary/12885_2007_1054_MOESM1_ESM.pdf/9470990)

# Cumulative distribution of age of onset

## NHL

## DLBCL

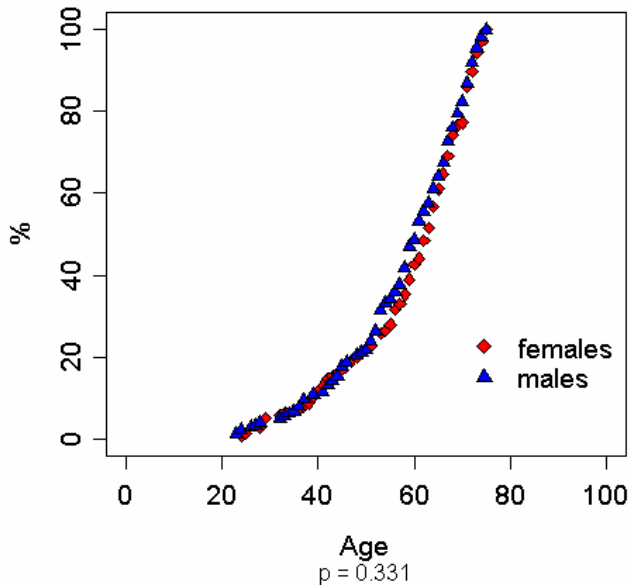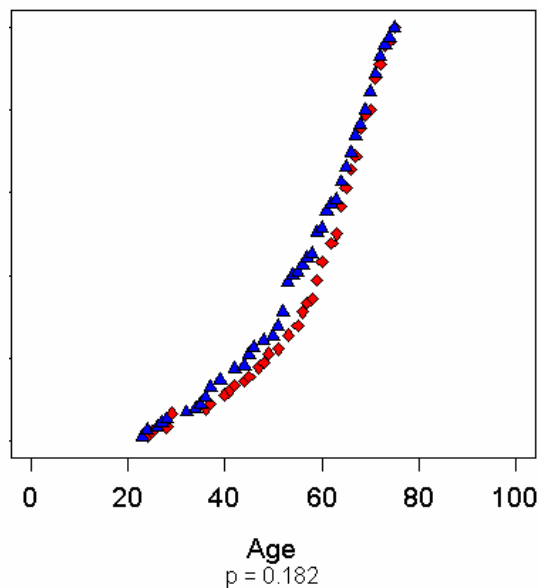

Supplement: MOESM1 [file 9470990]
